# Supplementary material for: The synthesis and tribological properties of small- and large-sized crystals of zeolitic imidazolate framework-71
Source: Royal Society of Chemistry journal article supplement (doi:10.1039/c5ra22877h), 2016-01-01
Supplement: c5ra22877h1.pdf [file c5ra22877h1.pdf]

## Supporting Information

# The Synthesis and Tribological Properties of Small- and Large-sized crystals of Zeolitic Imidazolate Framework-71

Yi-Hua Wang,<sup>a</sup> Qi Shi\*,<sup>a</sup> Hong Xu<sup>a</sup> and Jin-Xiang Dong\*<sup>a</sup>

<sup>a</sup> *Research Institute of Special Chemicals, Taiyuan University of Technology, Shanxi, Taiyuan, 030024, P.R.China, E-mail: [dongjinxiangwork@hotmail.com](mailto:dongjinxiangwork@hotmail.com), [shiqi594@163.com](mailto:shiqi594@163.com)*

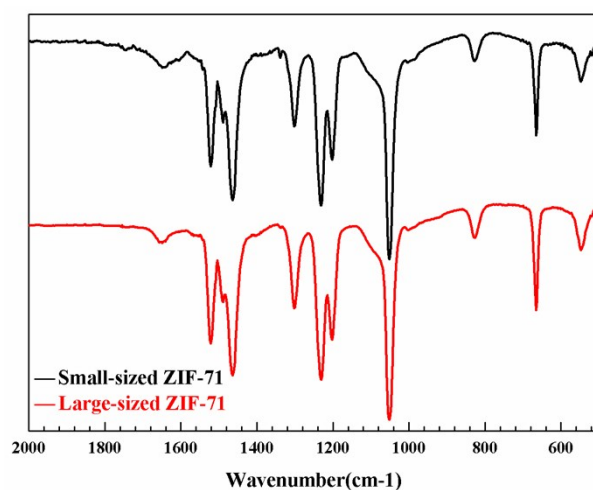

Fig. S1 FT-IR of small- and large-sized crystals of ZIF-71

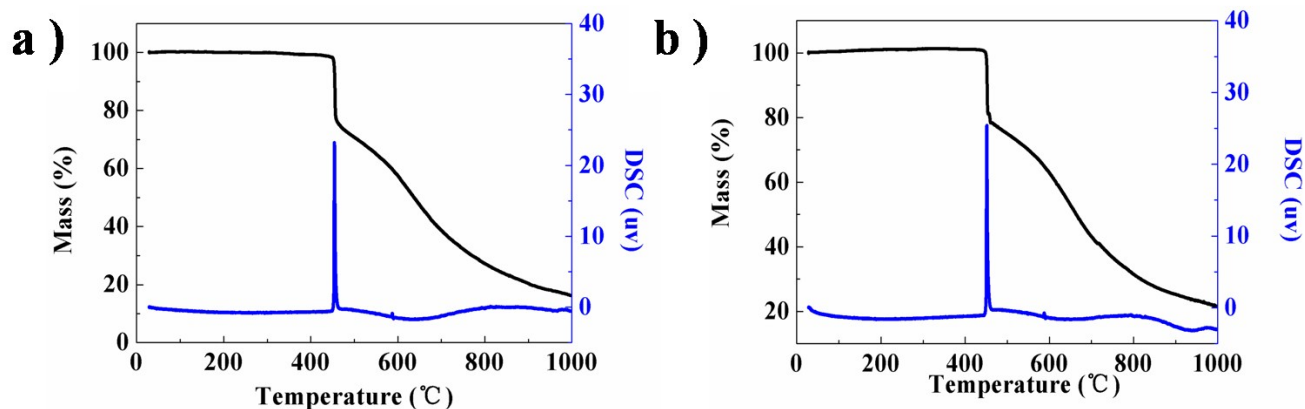

Fig. S2 TG-DSC curves of the (a) large-sized and (b) small-sized crystals of ZIF-71

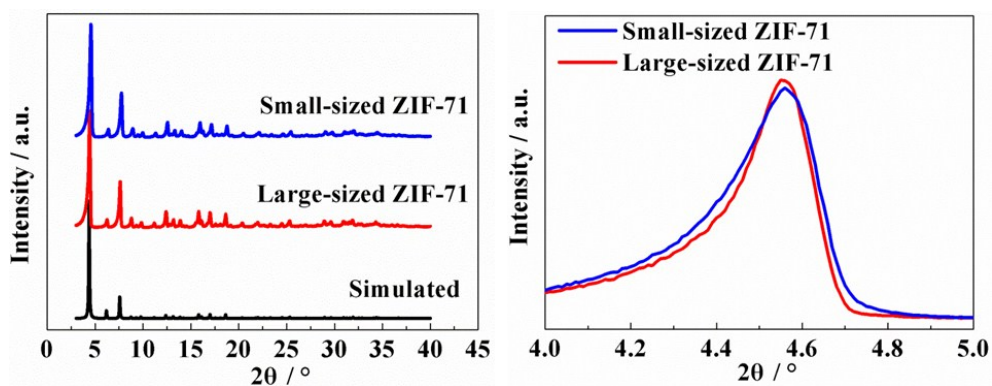

Fig. S3 PXRD pattern of the ZIF-71 product compared with the simulated ZIF-71 pattern (The right is partial enlarged detail).
